1 **Factors influencing the implementation of integrated screening for HIV, syphilis, and**  
2 **hepatitis B for pregnant women in Nepal: a qualitative study**

3

4 Lucie Sabin<sup>1\*</sup>, Hassan Haghparast-Bidgoli<sup>2¶</sup>, Bibhu Thapaliya<sup>3&</sup>, Obindra Chand<sup>4&</sup>, Sanju  
5 Bhattarai<sup>5#</sup>, Abriti Arjyal<sup>6#</sup>, Naomi Saville<sup>7¶</sup>

6

7 <sup>1</sup> Institute for Global Health, University College London, London, United Kingdom

8 <sup>2</sup> Institute for Global Health, University College London, London, United Kingdom

9 <sup>3</sup> Swisscontact, Kathmandu, Nepal

10 <sup>4</sup> School of Health and Social Care, University of Essex, Colchester, United Kingdom

11 <sup>5</sup> Department of Public Health and Nursing, Norwegian University of Science and  
12 Technology, Trondheim, Norway

13 <sup>6</sup> HERD International, Kathmandu, Nepal

14 <sup>7</sup> Institute for Global Health, University College London, London, United Kingdom

15

16 \* Corresponding author

17 E-mail: [lucie.sabin.21@ucl.ac.uk](mailto:lucie.sabin.21@ucl.ac.uk) (LS)

18

19 ¶ These authors contributed equally to the work.

20 & These authors also contributed equally to this work.

21 # These authors also contributed equally to this work.

## 22 **Abstract**

23 According to the Nepalese national guidelines, integrated screening for HIV, syphilis and  
24 hepatitis B should be offered free of charge to all pregnant women during their first antenatal  
25 visit. However, the screening uptake among pregnant women remains low in the country.  
26 Identifying factors influencing the implementation of integrated screening for HIV, syphilis,  
27 and hepatitis B is essential to increase uptake and prevent mother-to-child transmission. This  
28 study investigated the knowledge, attitude, and perceptions of pregnant women, their family  
29 members, healthcare workers and decision-makers on integrated antenatal screening. On the  
30 demand side, we conducted 26 semi-structured in-depth interviews with pregnant women,  
31 their husbands, and mothers-in-law in Kapilvastu and Kathmandu. On the supply side, we  
32 conducted 11 interviews with health workers involved in antenatal screening and local and  
33 national health system decision-makers. Data were analysed using a thematic content analysis.  
34 A combination of the social-ecological model and the WHO building blocks provided a  
35 theoretical framework for interpreting the data. The analysis showed that integrated antenatal  
36 screening for HIV, syphilis and hepatitis B in Nepal involved many stakeholders and was  
37 influenced by various factors. Barriers were mainly on the supply side, including a lack of  
38 resources, a shortage of healthcare workers and a lack of training. Husbands and in-laws also  
39 play an important role in the acceptance of screening by pregnant women, mainly in rural  
40 areas. Stigma and discrimination against people with sexually transmitted diseases were  
41 reported high in the communities, and knowledge of hepatitis B and syphilis was low.  
42 Improving integrated antenatal screening will require a multi-sectoral approach with greater  
43 engagement with communities through awareness programs and enhancement of the role of  
44 health posts. This study may be useful to inform decision-makers about the challenges and  
45 enable affecting integrated screening, to guide the design of targeted interventions to improve  
46 antenatal screening rates.

## 47 **Introduction**

48 Human Immunodeficiency Virus (HIV), syphilis and hepatitis B are major contributors to the  
49 global burden of disease and disability. In 2017, 5.2 million people were living with HIV in  
50 the Asia Pacific region (1). In 2012, an estimated 1.8 million women were infected with  
51 syphilis in the Southeast Asia region, including Nepal (2) and 39 million people with hepatitis  
52 B with a prevalence of 2.0% (3).

53 Information on the prevalence of these sexually transmitted diseases (STDs) in Nepal are  
54 scarce. In 2020, HIV prevalence is estimated at 0.12% among adults aged 15-49 years (4). In  
55 2019, the prevalence of hepatitis B was 0.9% (5). The majority of official data available for  
56 syphilis and hepatitis B are for specific population groups (e.g. sex workers and drug users)  
57 and no data available at national level (4).

58 HIV, syphilis and hepatitis B can be transmitted from infected mothers to their children  
59 during pregnancy, childbirth or breastfeeding also known as mother-to-child transmission  
60 (MTCT) or vertical transmission. An estimated 10,000 new HIV infections occurred among  
61 children aged 0–14 years in the Asia Pacific region in 2017 (1) and 1.3 million pregnant  
62 women are at risk of transmitting hepatitis B to their newborns each year (3). The global  
63 number of adverse pregnancy events attributable to maternal syphilis infection was estimated  
64 to 52,307 cases in the Southeast Asia Region and 13,472 in the Western Pacific Region (6).  
65 Screening during antenatal care (ANC) is a key to eliminating MTCT. Early detection of these  
66 diseases in pregnant women and appropriate treatment can drastically reduce the risk of  
67 vertical transmission (7–9). Since 2010, an estimated 7,400 new HIV infections among  
68 children in the Asia Pacific region were averted because of interventions aimed at reducing  
69 the MTCT of HIV (1).

70 To guide a path towards the triple elimination of MTCT of HIV, syphilis and hepatitis B in  
71 Asia and the Pacific, the World Health Organisation (WHO) developed a regional framework  
72 (10). This framework aims to eliminate these three infections in newborns and infants by 2030  
73 in Asia, emphasising the principle of care centred on the mother, newborn and child, and  
74 universal health coverage. The framework encourages an integrated approach to triple  
75 elimination, recognising the interconnectedness of the three diseases and the potential for  
76 resource optimisation. Integrated antenatal screening for HIV, syphilis and hepatitis B allows  
77 pregnant women to be tested for these three diseases with a single blood sample.

78 In Nepal, screening for HIV during pregnancy is included in the National HIV Testing and  
79 Treatment Guidelines and it is mandated to be offered free of charge to all pregnant women  
80 during their ANC visits (11). The guideline also states that all adults should be offered STD  
81 services while receiving HIV services. In addition, according to the 2030 roadmap for safe  
82 motherhood and newborn health in Nepal (12), HIV and syphilis screening should be  
83 routinely carried out together during ANC visits for pregnant women. However, screening for  
84 HIV remains low in Nepal. Out of a total of 755,647 pregnant women in 2019, 431,912 were  
85 tested for HIV (4). Limited information is available on the screening of syphilis and hepatitis  
86 B. On supply side, only 16 percent of facilities have the capacity to screen for syphilis  
87 infection (11) but no data is available for hepatitis B. Yet unknowingly infected women may  
88 transmit infections to their sexual partners or children through MTCT. This also prevents  
89 them from accessing timely treatment leading to long-term complications that generate  
90 significant costs to the health system. In addition, low uptake of STDs screening services can  
91 exacerbate existing health disparities, with vulnerable populations, such as marginalised  
92 communities or migrant populations, facing additional barriers to accessing screening  
93 services.

94 Many stakeholders are involved in the screening of HIV, syphilis and hepatitis B of pregnant  
95 women including healthcare workers on the supply-side and pregnant women's family  
96 members on the demand-side. Thus, as well as investigating the knowledge, attitude, and  
97 perceptions of pregnant women on integrated antenatal screening, it is essential to consider  
98 those of their family members and healthcare workers. Few studies in Nepal investigated  
99 demand side (13,14) and supply side (15) affecting antenatal screening of HIV. Roshna Thapa  
100 et al. (2019) (14) examined the association between women's empowerment and HIV testing  
101 among Nepali women using data from the 2012 Nepal Demographic and Health Survey. They  
102 found that age, education, and wealth were factors that determined HIV testing among  
103 women. Pokharel, Abbas, et Ghimire (2011) (13) studied the response to the implementation  
104 of the prevention of mother-to-child transmission programme and found that the acceptability  
105 of the test after counselling was satisfactory. They stressed the need for greater male  
106 involvement. Only one study examined supply-side barriers. Using the 2015 Nepal Health  
107 Facility Survey (NHFS), Acharya et al. (2020) (15) showed that the readiness of facilities for  
108 HIV counselling and testing services is higher than for STD services. They found persistent  
109 gaps in staffing, guidelines, drugs, and commodities in both services.

110 To the best of our knowledge, no study conducted in Nepal has investigated factors  
111 influencing integrated antenatal screening of HIV, syphilis, and hepatitis B. By interviewing  
112 pregnant women, their family members, health workers and decision-makers, this study aimed  
113 to explore the barriers and enabling factors to integrated antenatal screening for HIV, syphilis,  
114 and hepatitis B in Nepal. This study may be useful to inform decision-makers about the  
115 challenges and facilitators of integrated screening, guide the design of targeted interventions  
116 to improve antenatal screening rates in the country by removing potential barriers, and  
117 contribute to the global effort to improve maternal and child health by promoting integrated  
118 antenatal screening for HIV, syphilis, and hepatitis B.

## 119 **Methods**

### 120 **Setting**

121 Nepal's health budget has risen from NRs 23.81 billion in 2011 to NRs 122.79 billion in 2022,  
122 and the share of health expenditure in consolidated public spending has reached 7.5% of  
123 GDP, or 30% of current health expenditure. In 2021, external healthcare expenditure and out-  
124 of-pocket expenditure remained important, representing respectively 10% and 54% of current  
125 healthcare expenditure.

126 Many health workers from different health facilities are involved in the provision of screening  
127 for STDs for pregnant women in Nepal. Female Community Health Volunteers (FCHVs) play  
128 an important role in antenatal screening in rural communities. They link communities and the  
129 health system, providing basic health services and health awareness training. Health posts are  
130 the most available type of institution for primary healthcare in the communities across Nepal.  
131 Women go there for registration, ANC visits, screening, and immunisation as part of their  
132 pregnancy. Public hospitals have a larger capacity than health posts and often have more  
133 screening facilities. They are owned and operated by the government, while private hospitals  
134 are owned and operated by private entities. Other essential actors in antenatal screening in  
135 Nepal are non-governmental organisations (NGOs). Some are involved in screening at-risk  
136 individuals, treating, and monitoring positive cases.

137 For the purposes of our study, it is important to understand the differences between the  
138 Kathmandu Valley and Kapilvastu district where our study took place.

139 The Kathmandu Valley, with Kathmandu the federal capital city of Nepal, is the most  
140 developed urban area of Nepal with about more than 1.5 million population (16). Located in  
141 Bagmati province in the hills, the agglomeration attracts migrants from all over the country.

142 The Kathmandu Valley houses many of the health facilities in the country with 30 public  
143 hospitals including the Paropakar Maternity and Women’s Hospital (PMWH) - the national  
144 referral centre for obstetrics and numerous other tertiary referral hospitals and 82 health posts  
145 (17).

146 Kapilvastu is a *Terai* (plains) district, on the border with India, which has a 55-bed  
147 government district hospital and 12 health posts. Its geographical position makes it a district  
148 with a large population of Muslims, Madhesi Dalits and Hindu Indian origin ethnic groups.  
149 These groups are often marginalised and face discrimination (18). Male foreign labour  
150 migration to India, the Middle East and East Asian countries (especially Malaysia) (19) is  
151 widespread in this district which increases vulnerability to STDs. Most of the population are  
152 Awadhi-speaking rural farmers (20). The Terai area of Nepal has a low Human Development  
153 Index (HDI) score largely driven by poor education indicators (21) and the highest levels of  
154 gender disparity in Nepal (18).

## 155 **Participants recruitment**

156 Characteristics of participants are presented in **Error! Reference source not found.1**.  
 157 Participants were recruited between the 10 January 2023 and the 7 April 2023. On the demand  
 158 side, we conducted a total of 14 semi-structured in-depth interviews with main users or  
 159 beneficiaries (i.e. pregnant women) and their household members (i.e. their husbands and  
 160 mothers-in-law) in Kapilvastu and 12 in Kathmandu. We interviewed 12 currently pregnant  
 161 women (6 in Kapilvastu and 6 in Kathmandu) and since joint households is widespread in  
 162 Kapilvastu, we also interviewed 4 mothers-in-law. To explore male spouses' perspectives on  
 163 maternal health and antenatal screening for STDs we interviewed 10 husbands (4 in  
 164 Kapilvastu and 6 in Kathmandu), among them, five were husbands of pregnant women  
 165 interviewed.

166 **Table 1. Participants and required number of Semi-Structured Interviews (SSI)**

|                    | Activity | Criteria of selection                               | Kathmandu | Kapilvastu |
|--------------------|----------|-----------------------------------------------------|-----------|------------|
| <b>Demand side</b> |          |                                                     |           |            |
| Pregnant women     | 12 SSIs  | Woman from disadvantaged caste.                     | 3         | 3          |
|                    |          | Woman from high caste.                              | 3         | 3          |
| Husbands           | 10 SSIs  | Husband from disadvantaged caste.                   | 3         | 2          |
|                    |          | Husband from high caste.                            | 3         | 2          |
| Mothers-in-law     | 4 SSIs   | Mother-in-law from disadvantaged caste.             | -         | 2          |
|                    |          | Mother-in-law from high caste.                      | -         | 2          |
| <b>Total</b>       |          |                                                     | <b>12</b> | <b>14</b>  |
| <b>Supply side</b> |          |                                                     |           |            |
| Health workers     | 7 SSIs   | Health worker from public hospital                  | 1         | 1          |
|                    |          | Health worker from a stand-alone HIV testing site.  | 1         | 1          |
|                    |          | Health worker from a health post.                   | 1         | 1          |
|                    |          | Health worker from a private hospital.              | 1         | -          |
| Decision-makers    | 4 SSIs   | Rep' from the Ministry of Health.                   | 1         | -          |
|                    |          | Rep' from the health division of the Municipality.  | -         | 1          |
|                    |          | Rep' from the Nepal Health Sector Support Program.  | 1         | -          |
|                    |          | A person implementing programs for the Global Fund. | 1         | -          |
| <b>Total</b>       |          |                                                     | <b>7</b>  | <b>4</b>   |

167  
 168 In Kapilvastu, we contacted pregnant women through the Female Community Health  
 169 Volunteers (FCHVs) purposively approached in one semi-urban municipality (Kapilvastu)  
 170 and two rural municipalities (Shuddhodhan and Maya Devi). A trained and experienced  
 171 qualitative researcher (BT) worked with five females and a male local interviewer to locate  
 172 and interview pregnant women and their family members. They interviewed people of the



173 same gender respectively. We trained local interviewers based on our review of the literature  
174 on how to conduct interviews on sensitive topics (22,23). We conducted nine of the  
175 interviews in the local language Awadhi and five in Nepali. A previous study in a similar  
176 context overcame the reluctance of mothers-in-law to let their daughters-in-law be  
177 interviewed in private by implementing a parallel interview strategy (24). We applied a  
178 similar strategy by conducting concurrent but separate interviews in two different locations of  
179 the household with pregnant women and their mothers-in-law. We interviewed all the  
180 husbands alone around the household.

181 In Kathmandu, we identified and approached participants during their visits to the ANC  
182 clinics of the PWMH. A gynaecologist from the hospital introduced us and the study to the  
183 participants in the ANC unit. Pregnant women and husbands were interviewed in a café  
184 nearby where we could ensure privacy respectively by BT and a male qualitative researcher  
185 trained for this study. Participants gave their written consent to participate. Pregnant women  
186 and husbands were relatively reluctant to participate in the study as we met them in the  
187 hospital setting, they were often rushing to go home after their check-up. 2 pregnant women  
188 and 4 husbands refused consent. We audio recorded all interviews which lasted 30 minutes to  
189 2 hours.

190 On the supply side, we interviewed health workers involved in antenatal screening and local  
191 and national health system decision-makers. We conducted 4 interviews in Kapilvastu and 7  
192 in Kathmandu. Participant characteristics are presented in Tables 3 and 4.

193 **Table 3. Health workers' characteristics**

| No | Organisation    | Municipality | Occupation               | Years of experience | Gender |
|----|-----------------|--------------|--------------------------|---------------------|--------|
| 1  | Health post     | Kapilvastu   | Auxiliary Nurse Midwife  | 6                   | Female |
| 2  | NGO             | Kapilvastu   | Counsellor at ART Centre | 5                   | Female |
| 3  | Public hospital | Kapilvastu   | Nursing Officer          | 7                   | Female |
| 4  | Health post     | Kathmandu    | Auxiliary Nurse Midwife  | 23                  | Female |

|   |                  |           |                                         |    |        |
|---|------------------|-----------|-----------------------------------------|----|--------|
| 5 | Public hospital  | Kathmandu | Doctor                                  | 7  | Male   |
| 6 | Public hospital  | Kathmandu | Auxiliary Nurse Midwife                 | 38 | Female |
| 7 | Private hospital | Kathmandu | Registrar in Obstetrics and Gynaecology | 3  | Female |

194 **Table 4. Decision makers' characteristics**

| No | Organisation                                               | Occupation                                      | Years in current job | 195 |
|----|------------------------------------------------------------|-------------------------------------------------|----------------------|-----|
| 1  | Kapilvastu Municipality Office, Health Branch              | Health Coordinator                              | 7                    | 196 |
| 2  | Ministry of Health and Population, Family Welfare Division | Head of the Maternal and Newborn Health Section | 3 months             |     |
| 3  | Recovering Nepal                                           | Technical Advisor                               | 15                   | 197 |
| 4  | NHSSP                                                      | Former technical advisor                        | 10                   |     |

198 We interviewed any consenting mothers-in-law and husbands of a sampled pregnant woman.

199 In Kapilvastu, the strategy of interviewing pregnant women, husbands and mothers-in-law  
 200 from the same family was prioritized to allow triangulation resulting in a household with all  
 201 three household members interviewed, three with mother-in-law and pregnant women only  
 202 interviewed and three with husband and pregnant women interviewed. Since not all women's  
 203 husbands and mothers-in-law were available at the time of interviews, husbands and mothers-  
 204 in-law from different families were contacted until the sample size was met. This strategy of  
 205 interviewing people from the same household was not appropriate in the Kathmandu urban  
 206 context as pregnant women were reluctant to talk knowing that their partner would also be  
 207 interviewed. Although pregnant women were usually accompanied by their husbands, the  
 208 latter were in a hurry to get back to work. We were unable to interview mothers-in-law  
 209 because they did not accompany pregnant women on ANC visits. Saturation was reached by  
 210 the end of the data collection and new analytical insights from additional interviews became  
 211 rare.

212 Pregnant women and their families were interviewed about their experience of ANC visits,  
 213 blood tests, knowledge of and behaviours toward STD and antenatal screening for STDs  
 214 during pregnancy. Our topic guides evolved after the pilot phase and over time, to explore  
 215 emergent themes over the course of data collection. Vignettes, which allow for less personal

216 exploration of sensitive topics that participants might otherwise find difficult to discuss (25–  
217 27), were used to interview pregnant women and mothers-in-law. In the vignette, participants  
218 were presented with a hypothetical situation in which they were discussing ANC visits and  
219 blood tests with a friend. In this hypothetical situation, the friend was also asking for advice  
220 about a genital discharge and the possibility of a STD. They aimed to reveal people's beliefs  
221 and potential behaviours without being too intrusive. The vignette was designed according to  
222 the local context and on the advice of local researchers and is presented in Supporting  
223 information.

## 224 **Data analysis**

225 Data were analysed by LS and BT using NVivo to undertake thematic content analysis (28).  
226 A combination of the social ecological model and the WHO building blocks provided a  
227 theoretical framework for interpreting the data (Fig 1). The social ecological model proposes  
228 a holistic approach and considers the relationship between individuals and their environment  
229 to understand health-related behaviours (29). The model acknowledges that an individual's  
230 behaviour is shaped through complex and interrelated level factors. In this study and  
231 according to McLeroy et al. (1988) (29), five levels that influence behaviour will be  
232 considered. The first level of influence is the individual-level. This level refers to the personal  
233 characteristics of an individual that influence their behaviour such as age, gender, ethnicity,  
234 knowledge, attitudes, skills, and beliefs. The second is interpersonal level, which describes the  
235 relationships between individuals and the social networks they belong to, such as family,  
236 friends, and neighbours. The third is institutional level that includes formal and informal  
237 structures of health in this particular study. The fourth is community level, which refers to  
238 established norms and values, standards, and social networks. The higher level of influence is  
239 the national level, describes how the laws, regulations, and policies affect behaviour by  
240 creating or limiting opportunities and resources, shaping social norms, and changing the

241 physical and social environment. The WHO building blocks approach (30) was also used to  
242 analyse the data from the supply side perspective and was integrated to the social ecological  
243 framework. This approach provides a framework to improve the performances of health  
244 systems by considering six constituent elements: service delivery, health workforce, health  
245 information, medical products, health financing, and leadership and governance.

#### 246 **Figure 1. Combination of the social ecological model and the WHO building blocks**

247 After a step of familiarisation with the data, we read transcripts and carried out a line-by-line  
248 analysis by applying the different categories of the social ecological framework and the WHO  
249 building blocks in NVivo. To limit cultural bias and ensure rigor, we double coded some of  
250 the transcripts before finalising the main thematic framework and coding transcripts in  
251 NVivo. To develop a deeper analysis of the data, we also conducted a framework analysis  
252 (31). The codes identified in the thematic analysis were applied to the whole data in a  
253 systematic way. The themes were compared across the transcripts and specifically the  
254 different groups, to establish the range and similarities of the participants' perceptions,  
255 experiences and views. We tabulated quotes from the transcripts within and between  
256 transcripts to triangulate the data. We reported results in accordance with qualitative research  
257 guidelines (32,33) and the COREQ checklist (32).

258 This study has been conducted under an extension of the UCL Global Engagement funding  
259 for the Comprehensive Anaemia Programme of Preventive Therapies (CAPPT) project. We  
260 received ethical approval for this study from the Nepal Health Research Council and  
261 University College London Ethics Committee.

## 262 **Results**

263 We present the perspectives of the different participants together by comparing similarities  
264 and differences according to their localities and their characteristics. Results were presented

265 according to the categories of the social ecological model (29) and the WHO building blocks  
266 (30). Fig 2 summarises the findings according to the social ecological model and the WHO  
267 building blocks.

268 **Figure 2. Factors influencing access to and provision of antenatal screening for HIV,**  
269 **syphilis and hepatitis B in Nepal presented according to the social ecological model and**  
270 **the WHO building blocks**

## 271 **National level**

272 The WHO building block (30) on leadership and governance considers the policies,  
273 regulations and institutions that oversee and guide the health system and ensure the efficient  
274 and equitable provision of health services.

## 275 **National guidelines**

276 Syphilis, HIV, and hepatitis B screening is part of the ANC protocol in Nepal. However, in  
277 practice, STDs screening is not available in all facilities, in particular, rural health posts. This  
278 is despite claims to the contrary by the decision-maker interviewed from the Family Welfare  
279 Division of the Ministry of Health. *[PM2: HIV screening is conducted as a routine practice in  
280 Nepal, I remember it being implemented for a very long time, for more than 20 years, I think.  
281 Hepatitis B and Syphilis are also conducted routinely in every health institution in Nepal.]*

282 The implementation of elements included in the national guidelines is left to the discretion of  
283 the local government. They have to convince their elected representatives to give them a  
284 budget for it. The services included in ANC package and the charges are decided by hospital  
285 management committees and by the municipality in the case of health posts. In the context of  
286 Nepal's federalization introduced in 2015, the role of provincial and local governments is still  
287 unclear. *[PM3: For a long time, it was not clear whether the central or the federal  
288 government should look over the health office of the districts. Finally, the Sthaniya Ain [Local*

289 *Law] has been introduced. It clarifies the services that fall under the local government.*  
290 *However, it's still confusing whose responsibility it is to procure materials for the provincial*  
291 *level.]*

## 292 **Health budget and health financing**

293 The financing building block (WHO 2007) concerns with raising adequate fund for healthcare  
294 system, allocation of resources, and protect people from high costs of care seeking.

295 The Nepalese health system is largely dependent on external donors. *[PM3: The revenue*  
296 *collected by the Government of Nepal is not sufficient to run all the health programs. From*  
297 *what I know, the Government of Nepal has enough money for regular salaries, management*  
298 *and running some programs but the rest of the money is given by donors.]* Based on  
299 consultation with its various bodies, diplomatic and policy sectors, the Ministry of Health and  
300 Population (MoHP) decides on health priorities. It discusses at the national level how health  
301 projects can be financed and whether it will be necessary to seek external funding to meet the  
302 needs.

303 The ANC protocol also states that any ANC-related examination should be provided free of  
304 charge. However, STDs screening is not always available for free. *[HW7: When I was*  
305 *working in the maternity ward, there was a minimum charge. It was lower than in other*  
306 *hospitals, but it was not free.]* At the level of health facilities, municipalities make decisions  
307 for health posts regarding the budget allocated, the purchase of equipment such as test kits  
308 and the services to be provided free of charge. *[PM4: If it is a protocol guideline which is not*  
309 *mandated by the Constitution, then it is the discretion of the local government or the health*  
310 *coordinator to implement it. First, they need to be convinced that it is important. Then, they*  
311 *need to convince their elected members to give them a budget for implementation. They can*  
312 *ignore it and not implement it because they can choose to do something much more*

313 *appealing. Building a facility might be more appealing than just adding a small service which*  
314 *no one really knows.] Public hospitals are funded by provincial governments. The*  
315 *management committee of each hospital has the power to decide and prioritise which services*  
316 *to include in the ANC package and which services to provide free of charge, based on the*  
317 *recommendations in the government protocols. It must coordinate with municipal public*  
318 *health officials and doctors to make a service mandatory.*

319 *ANC visits are free of charge at health posts. In public hospitals, the price varies from one*  
320 *institution to another and depends on the content of the examinations. [HW7: Costs in public*  
321 *hospitals are low but they depend on the programs that the government is running.]*  
322 *Participants complained about the price of ANC visits in private hospitals. [PW4: In private*  
323 *health facilities, they take a lot of money, so it is better to go to health posts or government*  
324 *hospitals.] This difference in cost justifies participants' preference for public health facilities*  
325 *over private ones. [PW8: I did everything in a private hospital. I only came here [PMWH]*  
326 *three months ago because of monetary issues. It was too costly in the private hospital.]*

327 *When available at health posts, blood tests are provided free of charge. As with ANC visits,*  
328 *the price of blood tests varies from one public hospital to another. Blood tests are more*  
329 *expensive in private facilities, and patients complain about this to doctors. [HW7: In private*  
330 *hospitals, serology for hepatitis B is considered to be very expensive in comparison to HIV*  
331 *because it requires more equipment. Patients come and tell us: “these three tests are*  
332 *expensive, doctor”.] It is common for patients to go to private facilities for ANC visits, but to*  
333 *go to public facilities for blood tests because they are cheaper. [PW8: I was advised by the*  
334 *doctor that it's costly in the private hospital, so I went to a laboratory in Baneshwor.]*  
335 *Participants cited money as a reason for refusing blood screening during pregnancy. [PW6: I*  
336 *have not done blood tests because I don't have money. If I have money, then I would surely do*  
337 *the test.]*

338 Overall, health care professionals do not have a clear idea of the cost of the services they  
339 provide. [*I: What is the cost of a blood test for haemoglobin, HIV, syphilis and hepatitis B?*  
340 *Can you tell us the exact cost? HW6: No, I have no idea.*]

## 341 **Community-level**

### 342 **Taboo around sexual health**

343 Most pregnant women, husbands and mothers-in-law were reluctant to talk about STDs. They  
344 laughed nervously, cut the discussion short or refused to answer questions. Also, the topics  
345 discussed were one of the main reasons why people refused to participate in the interview.  
346 This attitude of people not being ready to open about the subject was also found in the  
347 interviews with health professionals.

348 Many interviewees pointed out that women may feel embarrassed to talk about sexual health,  
349 even with doctors. [*HW1: Even patients who come here cannot talk openly about their*  
350 *reproductive health problems. Sometimes, they come to us and secretly tell us their*  
351 *problems.*] Especially if the doctor is a male. [*PW2: If there is a female doctor, then we can*  
352 *talk openly about our problems. Even if there is no female doctor, then we should not feel shy*  
353 *with the male doctor because if we feel shy then we cannot survive. But it would be better if*  
354 *there is a female doctor instead of a male doctor.*] This was often a reason given by  
355 participants for the need for the husband or someone to accompany the woman. [*H7: If there*  
356 *is a male doctor, then it can be difficult for the woman. The husband should go to make the*  
357 *situation easier.*]

### 358 **Discriminatory attitudes and behaviours**

359 Discriminatory behaviours regarding hepatitis B and syphilis were difficult to capture, as  
360 people were generally unaware of these particular diseases. However, the interviews revealed



361 strong community stigma and peer pressure on HIV-positive people. *[H9: Some might feel the*  
362 *fear of embarrassment in society if the result comes positive because there is a practice of*  
363 *showing negative attitudes and discriminatory behaviour towards infected people in our*  
364 *society. Pregnant women might not agree to do the test due to the fear of being mistreated if*  
365 *they get diagnosed with STDs.] HIV-positive people are often discriminated against and even*  
366 *excluded from society. [HW2: The stigma here is that if you have contracted HIV, your life is*  
367 *over. How will I show my face? How am I going to get around?]* Thus, several participants  
368 emphasised the importance of awareness-raising programmes at the community level. *[PM1:*  
369 *Providing drugs is not enough. The main thing is to raise awareness. If people are aware,*  
370 *they can take care of themselves during pregnancy.]*

## 371 **Institutional level**

### 372 **Service delivery**

373 The service delivery building block (30) focuses on providing equitable access to essential  
374 health services that meet the needs of the population by guaranteeing the availability of  
375 resources and the quality of the services provided.

### 376 **Availability of services**

377 The availability of blood tests depends on health facilities. Blood tests are done at the first  
378 ANC visit, usually after the third month of pregnancy. STDs are tested during pregnancy with  
379 other tests such as blood group or haemoglobin, using the same blood sample. The content of  
380 the blood tests depends on the healthcare facility. *[HW3: The test for HIV was considered*  
381 *important but not the ones for syphilis and hepatitis B. With time, the demand for other tests*  
382 *also gradually increased. Now, the ANC check-up package includes haematology,*  
383 *biochemistry, and serology tests.]*

384 Participants reported long waiting times in some cases, but this did not seem to discourage  
385 them from accessing ANC services. [*I: Sometimes it takes 2 or 3 hours to meet the doctor and*  
386 *sometimes even a whole day without eating any food.*] Waiting times for ANC visits, blood  
387 tests and results vary from one health facility to another. According to interviews, waiting  
388 times for the test can range from zero in some health posts to several hours in public hospitals  
389 for ANC visits, and from one hour in health posts or some provincial hospitals to several days  
390 in the PMWH to receive blood test results. Distance to health facilities did not appear to be an  
391 issue for blood testing. Participants interviewed in the PMWH sometimes reported coming  
392 from far away to access that particular hospital. [*H9: I came with my wife on a motorbike. If I*  
393 *am alone, it takes about 1.5 hours. But I had to ride slowly with her as she is pregnant and*  
394 *sick, so it took around 2.5 hours.*]

395 Many interviewees referred, directly or indirectly, to the referral of patients from lower- to  
396 higher-level facilities. One example that emerged repeatedly in the interviews was the referral  
397 of patients from health posts that do not have laboratory or ultrasound facilities, or in case of  
398 complications during pregnancy, to public hospitals. [*HW4: We don't have ultrasound*  
399 *facilities. If an anomaly is detected in time, we are obliged to refer them elsewhere. They are*  
400 *referred to other services depending on their needs.*] Patients are also referred from one  
401 department to another within the same hospital. Several problems with the referral system  
402 emerged from the interviews. It sometimes makes it difficult for people to access care, creates  
403 confusion and leads to loss of follow-up during pregnancy. [*HW4: They find it complicated*  
404 *when we refer them to the hospital.*] This also sometimes leads to the saturation of the largest  
405 public hospitals. [*HW4: Everyone knows PMWH, but it is crowded most of the time.*] This  
406 referral system is sometimes used as an excuse for not taking care of HIV-positive patients.  
407 [*HW2: They would not admit an HIV-positive patient. They would still refer him to another*  
408 *health facility.*]

## 409 **Quality of care**

410 Overall, participants reported a high level of overcrowding in public hospitals that influence  
411 the quality of the services provided. *[PW12: There is so much crowd that patients enter the*  
412 *room for their turn before the previous one has completed the check-up. We can't ask for*  
413 *anything and doctors don't have time to explain things.]*

414 Even when blood tests are carried out, the quality of services is not always good. Some  
415 participants reported errors, receiving other people's results or unreadable reports. *[PW11:*  
416 *When I had a miscarriage, I did a blood test in a polyclinic nearby and my blood group was*  
417 *different. Since then, I don't want to do any tests there again because the report might have*  
418 *been exchanged with someone else.]* Others complained that the results of the blood tests were  
419 not explained to them by health workers. *[PW12: I came back after three days to get the*  
420 *report, but they did not tell me anything about it. I asked them whether I should go to ask*  
421 *about the report. Nobody told me anything about that, so I did not go anywhere.]*

422 Most of the participants said that they had not been counselled about blood tests and STDs.  
423 *[PW2: Health workers didn't tell me anything. They just took the blood sample. It was very*  
424 *crowded.]* When counselling is provided, it is for HIV, but not for hepatitis B or syphilis.  
425 *[HW6: The counselling is about the prevention of HIV transmission from mother to child. I do*  
426 *not need to tell them about hepatitis B and syphilis.]* According to health workers, this  
427 depends on the health facility. For example, Tribhuvan University Teaching Hospital has a  
428 nurse who specialises in counselling, while health workers at other health facilities involved  
429 in ANC visits reported not doing counselling at all. Health workers justified not counselling  
430 pregnant women by the lack of time or space to do so, but also by the lack of interest or  
431 capacity to understand from the patients. *[HW7: In most health facilities, there is limited time*  
432 *for counselling. We cannot give half an hour or an hour to a patient when we have to deal*

433 *with 100 or 150 patients. Sometimes, when people hear about HIV, they become reluctant, so*  
434 *we have to explain it to them. For hepatitis B, if patients understand and are willing to listen,*  
435 *then we explain to them too. Counselling is not done uniformly between patients, sometimes*  
436 *the explanations are done correctly but sometimes they are not.] Some health workers also*  
437 *felt that it was easier not to mention STDs, as this would lead women to refuse blood tests.*  
438 *[HW1: The easiest way to counsel them about blood screening is to tell them that the test*  
439 *should be done to see if there is a problem in the blood. If we explain each test to them, they*  
440 *may not be able to understand it. Also, mentioning STDs may make them angry because they*  
441 *may feel insulted. They don't readily accept such tests.] However, most health workers who*  
442 *report not counselling patients also say that they are happy to answer women's specific*  
443 *questions about blood tests. [HW4: We tell them that we will do a blood test. If they ask, we*  
444 *tell them that we will do these and these tests and tell them everything, but they never ask this*  
445 *kind of question.]*

446 Two health workers in the rural area cited language as a barrier to providing services to  
447 individuals, primarily counselling. *[HW1: At first, I was confronted with the problem of the*  
448 *Awadhi language but little by little, I managed and adapted to it. I'm still struggling to make*  
449 *sentences, but I can speak well enough to communicate.]*

## 450 **Health workforce**

451 The building block (30) that considers health workforce addresses the availability,  
452 distribution, and capacity of healthcare workers.

### 453 **Training and shortage of health workers**

454 Most interviews revealed a shortage of healthcare workers, especially skilled workers. Many  
455 participants pointed to the large number of patients that need to be cared for by a limited  
456 number of health workers. *[H1: Thousands of people go to hospitals every day, so they are*

457 *quite quick and give you information on the subject very quickly.] This shortage results in a*  
458 *lack of time to provide health services and threatens their quality. [PM4: Most of the ANC*  
459 *rooms are really busy. There will be women inside the room and the process of ANC is less*  
460 *than 5 minutes.] Participants also complained about the lack of follow-up by doctors. [PW9:*  
461 *You want to show your report to the same doctor, but it doesn't happen that way. Even if it's*  
462 *the same day, the doctor changes from time to time.]*

463 Training of health workers is usually provided by the health facilities themselves or by the  
464 municipality. NGOs are also sometimes responsible for training health workers on specific  
465 topics. Some health workers reported that they had not received training for decades. [HW6:  
466 *After 2015, we did not receive any training. I had a 7-day training on the prevention of*  
467 *mother-to-child transmission of HIV and a 10-day training on breastfeeding, but it was about*  
468 *8-9 years ago.] Almost all complained about the lack of regular training. [HW4: Nowadays,*  
469 *the municipality provides the training, but it is not enough to improve the skills like it used to*  
470 *be before even if routine training is provided to health workers.]*

#### 471 **Attitudes of health workers**

472 Regarding the attitude of the health workers, most pregnant women and their relatives said  
473 that the health workers had the right attitude, often described as kind. [PW7: *They are always*  
474 *cheerful and behave decently with me.] Some participants reported inappropriate behaviour*  
475 *by health workers, such as rudeness or hostility toward pregnant women. [PW12: Sometimes,*  
476 *when we ask them about anything, they scold us so badly for not knowing it. Once, I asked*  
477 *them about where I can get the blood test reports from. They shouted at me so badly asking*  
478 *why I don't read myself and whether I have eyes or not. I felt very bad. Some are good but*  
479 *some of them are very aggressive.] Also, some participants complained about the lack of*  
480 *listening by health workers. [I: Have you ever experienced someone who behaved badly with*  
481 *you? PW5: Yes, sometimes they do not listen to you at all.] With respect to STDs, health*

482 professionals were generally reluctant to talk about discriminatory behaviour in their  
483 profession. However, some decision-makers and health workers revealed that this type of  
484 behaviour is quite common. *[HW2: Health workers still act rudely sometimes. Sometimes*  
485 *clients even refuse to enter health facilities. Even HIV-positive people with health insurance*  
486 *are reluctant to come because the health staff do not treat them properly and send them from*  
487 *one place to another.]* They also indicated that the situation had improved. All health workers  
488 reported that they strive to maintain confidentiality, but face difficulties in practice, mainly  
489 due to lack of space.

490 The interviews revealed that, overall, people trust health workers. They often indicated that  
491 they give them good suggestions. *[ML3: Health workers in the health post will give her good*  
492 *suggestions. If we take suggestions, we can get good treatment and the right medicines.]*  
493 Participants said they were willing to listen to them and do what they recommended because  
494 they had better knowledge. *[ML2: We are uneducated, and we do not understand anything. If*  
495 *it affects the health of a pregnant woman as well as the child then, we will follow the doctor's*  
496 *suggestion. We will try to follow whatever they tell us.]* However, some people suggested that  
497 people sometimes did not trust them and preferred to seek confirmation at different health  
498 facilities. *[PW2: The doctor said that there was no heartbeat. I did not believe it. The next*  
499 *day, I went to Bhairahawa for an ultrasound. They said the same thing there too.]*

## 500 **Health information**

501 The health information building block (30) involves the collection, analysis and dissemination  
502 of data and information relating to health in order to facilitate decision-making and monitor  
503 the health of populations.

504 In Nepal, women's maternity data is only reported after three months of pregnancy. Any event  
505 or illness occurring before the third month of pregnancy is not recorded in the Integrated

506 Health Management Information System (IHMIS). The recording of STD data is done  
507 manually by health workers in all health facilities. While HIV data seems to be systematically  
508 recorded, this is not the case for syphilis and hepatitis B. According to some health workers,  
509 the lack of available information on syphilis and hepatitis B is due to the lack of available test  
510 kits and the lack of staff and time to record the data. *[HW7: In all facilities, data is reported*  
511 *manually. Patient loads are high, outpatient departments are busy with sometimes 200 to 300*  
512 *patients coming and manpower is limited. We try to record data as much as possible, but we*  
513 *do not write the data both on the patients' cards and in our data.]*

#### 514 **Medical products**

515 The building block (30) that considers access to essential medicines addresses the availability  
516 and appropriate use of medicines, vaccines, and medical equipment, with a focus on quality,  
517 safety, and affordability.

518 Interviews revealed a general lack of resources. *[PW9: They told me there was no heartbeat.*  
519 *They advised me to get admitted but due to a lack of beds at the emergency service, they could*  
520 *not admit me.]* While HIV testing kits are generally available in health facilities, syphilis and  
521 hepatitis B testing kits are often not available due to shortages. *[HW3: HIV test kits are*  
522 *usually available but not kits to test hepatitis B and syphilis. They are not funded by any*  
523 *program, and we cannot afford them. HIV kits are available through external funding.]*

524 Laboratory services are often not available at health posts. *[PM4: We have ANC all over*  
525 *Nepal but screening for STDs is available only wherever there are laboratory facilities. That*  
526 *will be less than 200 government health facilities, hospitals, and a few Primary Health Care*  
527 *centres. The availability of ANC is very good in Nepal but when you go deep into the service*  
528 *and look at the quality and the components. Then what we call availability becomes poor.]*

529 Many health workers also complained about the lack of appropriate counselling spaces.  
530 *[PM2: There are counselling rooms in the hospitals, but not in small health posts.]*

## 531 **Interpersonal level**

### 532 **Husband's willingness to support**

533 Overall, the husbands interviewed expressed a willingness to be involved in their wives'  
534 pregnancies and often attested to supporting their wives with daily tasks. [*I: Do you support*  
535 *your wife during her pregnancy? H4: Yes, I support her 100%. I do not let her carry heavy*  
536 *objects or wash clothes. I encourage her to rest properly and follow doctors' advice.*]

537 However, some husbands reported not having any information about their wife's pregnancy  
538 other than that the baby is doing well. [*H2: She said that the baby is normal and healthy, so I*  
539 *didn't ask her about anything else. We were more concerned about the baby, so I didn't think*  
540 *it was important to ask about anything else.*] While some couples discuss the pregnancy  
541 openly, others do not discuss it at all with each other. [*H4: We spontaneously exchange*  
542 *health-related information, such as what we should do, whether we should go for a walk, etc.*]

543 In urban settings, some husbands reported accompanying their wives on ANC visits.  
544 However, in large urban hospitals, they are sometimes not allowed to enter the room for  
545 check-ups, even if they want to [*H6: Health workers should welcome both the husband and*  
546 *his wife. They should tell me about the problems of my wife and that I should not worry.*]

547 Husbands often expressed their inability to be there as much as they would like to be for their  
548 wives because of their work and the pressure to bring money into the household. [*H6:*  
549 *Sometimes when I did not have time to go with her due to office obligations, she went alone.*  
550 *Otherwise, we always go together.*]

551 In the migratory context of Nepal, among the eighteen families interviewed, four husbands,  
552 living in Kapilvastu, were reported not living with their wives now or in the previous months  
553 but abroad or in another city. Communication difficulties within the couple are sometimes  
554 reinforced by the lack of proximity when the husband has to migrate. In this situation,



555 communication sometimes takes place through the pregnant woman's in-laws. *[PW1: I told*  
556 *my sister-in-law first, then she shared it with everyone else. I: Didn't you share the news with*  
557 *others? PW1: No because I was feeling shy.]*

558 With respect to STDs in particular, most husbands expressed support for their wives if she  
559 had symptoms of an STD. *[H7: If women get infected with STDs, they need full support from*  
560 *their husband. Husbands should go with their wives as they could have problems like*  
561 *difficulty walking, and dizziness.]* Mainly if she needs their help in discussing her situation  
562 with health professionals. *[H3: Some women might feel shy. I will tell my wife that I will come*  
563 *with her. She should not be scared.]* However, several women and health professionals  
564 interviewed pointed out that in practice, some husbands are not as supportive and  
565 understanding. *[PW11: Although my husband is understanding, many pregnant women have*  
566 *husbands who do not understand or care about them.]* Most interviewees said that the  
567 husband should be the first to know about his wife's sexual health problems and that husbands  
568 should also be tested as part of antenatal screening for STD. *[PW3: It is important and*  
569 *necessary that the husband take a blood test too. It will help to identify who is infected and*  
570 *how we can prevent it.]*

### 571 **In-laws' involvement**

572 In joint households, which are very common in rural areas, the parents-in-law are involved in  
573 the pregnant woman's health, mainly the mothers-in-law or sisters-in-law. Indeed, the topics  
574 of pregnancy, sexual health or STDs are more easily discussed with people of the same sex.  
575 *[I: Do you think she should tell her husband? PW1: Yes, and her mother-in-law or sister-in-*  
576 *law, but not her father-in-law.]* The involvement of in-laws may take the form of advice,  
577 pressure, or accompaniment during check-ups. *[HW3: If they are having repeated infections*  
578 *or lower abdominal pain during intercourse, they can't share such things in front of their*  
579 *mother-in-law. The mother-in-law may try to normalise the problems and demoralise the*

580 *patients by not giving importance to their problems.]* In contrast, some mothers-in-law  
581 support their daughters-in-law. *[ML1: It is normal to help my daughter-in-law like this. She*  
582 *left her father and mother and came to live with us as if we were her parents. We must help*  
583 *her and understand her pain.]* Pregnant women generally need the permission of their in-laws  
584 before making decisions about their health. *[I: If the doctor says that they need to take your*  
585 *blood for STD tests, what would you do? PW3: I will say that I will decide after consulting*  
586 *with my family. I will ask my relatives if they want it or not. I will do as per their wish. I can't*  
587 *just do whatever I want.]* In the context of migration, the husband often entrusts his wife to  
588 his family. *[H1: Our family lives together, so even if I can't help and support her, my family*  
589 *supports her when I'm not there.]*

## 590 **Neighbours' involvement**

591 In rural settings, neighbours are also an important source of information about health in  
592 general, the availability of health services and pregnancy in particular. *[PW5: My neighbour*  
593 *told me to go for a check-up if I had any health problem.]* In the case of STDs, participants  
594 shared that they learned a person's STD status from neighbours. *[I: Have you ever heard of*  
595 *anyone infected with HIV, syphilis, or hepatitis B? PW12: My neighbours said that someone*  
596 *has such a disease so we should not visit him, otherwise we would get infected too.]* They  
597 play an important role in spreading rumours about the health of individuals and stigmatising  
598 behaviour. *[H2: There was a rumour in the village that he has HIV. We cannot go to visit him*  
599 *after knowing this about him.]* This type of behaviour seemed to be more present in rural  
600 areas and was not reported by participants in the Kathmandu Valley. *[H1: In urban areas like*  
601 *Pokhara, everyone is busy with their own work, why should I interfere in other people's life?]*

## 602 **Individual-level**

### 603 **Health negligence**

604 Some participants reported that they follow health workers' recommendations carefully, go for  
605 regular check-ups, and comply with treatments. *[PW1: I usually go for ultrasounds when they*  
606 *call me. I've never missed an appointment.]* On the contrary, some participants, through the  
607 description of certain situations or more directly the health workers interviewed, revealed the  
608 negligence of individuals in health-related matters. *[PW4: The doctor told me to visit again*  
609 *but I did not.]* In the case of family members and given their involvement in the pregnancies  
610 described above in rural settings, their neglect has direct consequences since women's health  
611 and consultations depend on them. *[PW2: I asked my in-laws to go for another check-up*  
612 *because it might be a problem with medication, but they did not take me for the check-up and*  
613 *then I stopped the medicines.]*

614 Another established norm in Nepal that emerged from the interviews is that if there are no  
615 significant symptoms, people believe that there is no disease or that it will heal on its own or  
616 with home remedies. *[HW3: They first follow all the possible home remedies they can. If*  
617 *nothing works, then only they come to the hospital for help.]* Thus, people only go to the  
618 hospital if the illness is severe, and the symptoms are important. *[HW2: Here we have a*  
619 *scenario where patients only go to the hospital when their condition is really serious. For*  
620 *example, with STDs, if patients have severe back pain or abnormal discharge or something*  
621 *serious, then only they feel the need to go to the hospital.]* People also tend to hide their health  
622 problems in general and especially when it comes to sexual health. *[PW11: Usually, people*  
623 *keep their disease secret, mostly in the village areas. It is similar in the case of miscarriage.*  
624 *For example, I did not reveal mine.]*

## 625 **Knowledge about blood tests and STDs**

626 When asked about their knowledge of ANC check-ups and blood tests, most participants were  
627 aware of their importance, although they did not know what was diagnosed by blood tests.  
628 When asked about their knowledge of STDs, most participants said they had heard of HIV

629 and had some vague knowledge of the mode of transmission or symptoms. A limited number  
630 of educated participants have a good knowledge of the subject, mostly in urban settings. [*H9:*  
631 *HIV is a disease which gets transmitted through blood and sexual activities. It can get*  
632 *transmitted through blood by the use of needles, razors and sharp instruments if they are not*  
633 *sterilised.*] However, there is generally some confusion and misconception. [*H2: HIV can be*  
634 *transmitted by sitting and talking together. It can also be transmitted through sex or by living*  
635 *and sleeping together. If someone has this disease, we should not sit or live with him. We*  
636 *should keep our distance from such people.*] Participants reported hearing about it in the  
637 media, primarily on the radio, or during their studies. Most participants had never heard of  
638 syphilis and hepatitis B and had very low knowledge and awareness of their symptoms and  
639 mode of transmission.

#### 640 **Acceptance of blood tests**

641 Consent for blood screening during pregnancy is given verbally by pregnant women. Health  
642 workers reported that blood tests were generally well accepted. This was confirmed by the  
643 pregnant women, husbands and mothers-in-law interviewed. The main reason given for the  
644 acceptance of blood tests was their importance to the health of the child and the mother.  
645 [*ML2: I would strongly advise the pregnant women to take a blood test timely as it helps to*  
646 *know if the health of the baby and mother is going well.*] Most of the people interviewed said  
647 they would accept the blood test, regardless of its purpose. This view was not shared by health  
648 professionals, who felt that most people would refuse it if it was explicitly explained to them  
649 that it was to test for STDs. [*HW2: If you organise a campaign to test blood for dengue,*  
650 *diabetes and malaria, they will readily agree to take the blood test. However, they will hardly*  
651 *agree to the same blood test for STDs. They would rather run away or scold you. They will*  
652 *certainly not agree to take the blood test.*] Potential reasons for reluctance to accept blood  
653 tests that emerged from the interviews were financial constraints, but also the fact that people

654 do not consider them necessary because they are healthy or, conversely, they fear the results.  
655 *[H1: There are many reasons for not agreeing to have a blood test: for fear of what people*  
656 *might say, for fear of the disease, and in some cases, some people may feel that it is not*  
657 *necessary.]*

## 658 **Deciding which health facility to visit**

659 People reported preferring to receive all their care in a single establishment. *[HW4: Patients*  
660 *feel that they would feel more comfortable if all services were provided in this health facility,*  
661 *including ultrasound, instead of having to go to hospitals.]* However, the decision to change  
662 health facilities during pregnancy sometimes comes from the individuals themselves. In rural  
663 area, people sometimes come to the health post with reports of test results from private or  
664 public hospitals to confirm interpretations. This shows people's trust in local health structures.  
665 *[H9: We took with us the report of the blood test we did at Binayak Hospital two or three*  
666 *days ago at the health post. Based on that report, they gave us some suggestions.]* In the  
667 Kathmandu Valley, people sometimes choose health facilities where to access ANC services,  
668 knowing that they will eventually be referred by health professionals. *[PW9: We thought that*  
669 *even if I go to a private hospital, they will refer me to this place if any complication arises, so*  
670 *why not come here directly.]* Participants also indicated that they went to larger public  
671 facilities, believing that the services provided would be of better quality, or to private clinics  
672 to avoid the crowds in public hospitals. *[HW6: People from elsewhere think that they have to*  
673 *come to this hospital to deliver properly and avoid complications during operations. They*  
674 *may think that there are few or fewer qualified doctors in their area.]* In the latter case,  
675 people usually come for a few ANC visits but cannot afford to do them all. *[HW7: Per visit, it*  
676 *costs 500 rupees, so they do one visit here and then we lose the follow-up. They think*  
677 *something like let's pay for once to deviate from the government hospital line.]*

678 **Differences and similarities in perceptions between respondents in**

679 **Kapilvastu (rural plains) and Kathmandu (urban)**

680 Rural and urban settings differed in terms of respondents' perceptions and the barriers and  
681 facilitators to antenatal screening identified. While, on the whole, the lack of resources in the  
682 health system emerged as one of the main barriers to antenatal screening in both urban and  
683 rural areas, the lack of STD screening services was reported more by participants in  
684 Kapilvastu, mainly at health posts. Similarly, referral of patients from health posts to public  
685 hospitals with laboratories was more common in rural areas. All health workers said that they  
686 tried to maintain confidentiality, but health workers working in Kathmandu said that they  
687 encountered difficulties in doing so, mainly due to lack of space. In Kathmandu, many health  
688 workers also complained about the lack of appropriate counselling facilities. This issue did  
689 not come up in the Kapilvastu interviews. In urban areas, participants highlighted the large  
690 number of patients who have to be cared for by a limited number of health workers, mainly in  
691 large urban hospitals, and participants complained about waiting times and husbands not  
692 being allowed to enter the room with their wives for examinations, even if they wanted to.

693 While husbands in both rural and urban areas expressed their inability to be as present as they  
694 would like for their wives, the reasons cited differed between the two settings. In Kathmandu,  
695 the main reason was work. In rural areas, husbands often lived abroad or in another town. In  
696 rural areas, joint households are more common than in Kathmandu, which makes the  
697 involvement of in-laws in the pregnant woman's health more important there. Similarly, the  
698 involvement of neighbours as a source of information, the spreading of rumours about  
699 people's health and stigmatising behaviour were not reported in the Kathmandu valley,  
700 whereas they were by several participants in Kapilvastu. While the attitude of people not  
701 being ready to open up on the subject of STDs was found in both rural and urban areas, this

702 finding was more exacerbated among participants in Kapilvastu. Some health workers in  
703 Kapilvastu were not even prepared to say the words "sexually transmitted diseases".

## 704 **Differences and similarities in perceptions between different** 705 **household members**

706 In interviews with the members of the same households some interesting similarities and  
707 differences between household members' perceptions emerged. Husbands and mothers-in-law  
708 were generally less reluctant to talk about pregnancy and their knowledge of STDs than  
709 pregnant women. Pregnant women were particularly reluctant to talk about the subject, even if  
710 the interviewer was of the same sex. In the joint households interviewed in Kapilvastu, most  
711 of the pregnant women were embarrassed to talk about their mother-in-law's involvement in  
712 their pregnancy, even if she was not in the room, whereas the mothers-in-law were not  
713 embarrassed to talk about their daughter-in-law.

714 Husbands expressed support for their wives if they had STD symptoms, while pregnant  
715 women and mothers-in-law tended to perceive husbands' support as weak in some cases, as  
716 husbands were not as understanding as they might say. The main reason given by husbands  
717 for accepting blood tests was their importance for the child's health, while the health of both  
718 mother and child was mentioned by mothers-in-law and pregnant women. Husbands and  
719 pregnant women agreed that they wanted the husbands to be involved in their wives'  
720 pregnancies but tended to differ in their perceptions of in-laws' involvement. Some pregnant  
721 women complained about the involvement of their mothers-in-law and sisters-in-law in their  
722 pregnancy, particularly in Kapilvastu, while husbands and mothers-in-law were quite satisfied  
723 about it.

## 724 **Discussion**

725 This qualitative study showed that integrated antenatal screening for HIV, syphilis and  
726 hepatitis B in Nepal involved many stakeholders and was influenced by factors at different  
727 levels of the socioecological model and across the different WHO building blocks. Barriers to  
728 antenatal screening were mainly on the supply side, including a general lack of resources, a  
729 shortage of healthcare workers and a lack of training. However, husbands and in-laws also  
730 played an important role in the acceptance of screening by pregnant women in the Nepalese  
731 context, mostly in the rural setting.

732 Integrated screening for HIV, syphilis and hepatitis B in Nepal is part of the National HIV  
733 Testing and Treatment Guidelines and it is mandated to be offered free of charge to all  
734 pregnant women during their ANC visits (11). However, there is a lack of information on the  
735 coverage of screening for syphilis and hepatitis B, which is not included in HMIS or national  
736 surveys, making the investigation very difficult. The implementation of HIV screening is  
737 limited and uneven across regions. In Gandaki Province, 25% of pregnant women received an  
738 HIV test during ANC compared to only 7% in Karnali Province (34). This is mainly due to  
739 competing priorities at local level with the social sector, including health, no longer taking  
740 priority over other directly visible investments such as road or building construction, which  
741 would encourage the re-election of decision-makers (35,36). Political instability, which makes  
742 it difficult to implement long-term decisions (37), and a general lack of resources (15) are  
743 other main factors. In provincial hospitals, this lack of resources is mainly reflected in a lack  
744 of space, which prevents counselling in private, and a shortage of qualified healthcare  
745 workers. These results were found by other studies conducted in Jumla (38) and southern  
746 plains in Nepal (39). Insufficient healthcare workers translates into a lack of time to provide  
747 health services, which threatens service quality and increases women's waiting times. In  
748 lower-level healthcare facilities, such as health posts, a lack of laboratory services or  
749 screening equipment, especially for syphilis and hepatitis B is a major problem. Overall,



750 health workers suffer from a lack of appropriate training on STDs which is important to  
751 reduce stigmatising behaviour (40,41).

752 Local authorities play an important role in the implementation of integrated antenatal  
753 screening. Despite an overall lack of clarity in roles and responsibilities between different  
754 levels of government since the federalisation in 2017 (42), municipality-level health  
755 coordinators and the elected officials in-charge play a key role in the implementation of health  
756 protocols and allocation of funding. Yet the elected officials often lack technical training or  
757 experience to inform their decision-making (36) and integrated antenatal screening for STDs  
758 was often not a priority for decision-makers (15,36). Meanwhile, the federalisation increased  
759 the number of layers for decision making and the high administration burden increase the time  
760 required to introduce changes (36). As in other areas such as education, the move to  
761 federalism can also create tensions over the division of authority between federal and local  
762 government, reducing the effectiveness of decision-making (36,43).

763 Our study reveals the importance of the referral system in Nepal for ANC and blood tests  
764 during pregnancy and especially in rural areas where access to screening services is limited  
765 (44). Referral systems are meant to ensure that patients receive appropriate and timely health  
766 services, but it is sometimes high levels of referral are responsible for hospital services  
767 becoming clogged with ‘normal’ cases that are not in need of specialised care. The lack of  
768 screening facilities in lower-level facilities plays a large role in the process. Despite this, we  
769 found that individuals have high trust in local health facilities which suggests that there is an  
770 opportunity to enhance screening and counselling at health posts to reduce the need for  
771 referral. Massive investment in laboratories in public health facilities at the lower level is  
772 needed to implement triple screening at an acceptable level.

773 HIV screening during pregnancy falls under the Prevention of Mother-to-Child Transmission  
774 program (45), implemented by the Ministry of Health and Population of Nepal with support  
775 from various international organisations, including UNICEF, the World Health Organization  
776 (WHO), and the United States Agency for International Development (USAID). This program  
777 is independent from the ANC program. Among the three diseases we consider, HIV received  
778 a larger coverage in terms of screening resources, awareness campaigns and media coverage.  
779 HIV screening is of high interest worldwide and Nepal has received substantial financial aid  
780 in the last decade from the international community (46). However, this is not the case for  
781 syphilis and hepatitis B despite higher prevalence of these diseases compared to HIV in the  
782 country (6). A systemic lack of resources for antenatal screening of syphilis and hepatitis B  
783 and the fact that data are not systematically reported for these diseases (47) means that these  
784 diseases and their transmission from mother to child remain woefully neglected. The fact that  
785 facilities are less able to provide hepatitis B and syphilis screening services than HIV or ANC  
786 services indicates that these services have not been fully integrated (15). If rapid tests exist for  
787 HIV and are used in Nepal, a similar investment in the provision of rapid tests for hepatitis B  
788 and syphilis could facilitate antenatal screening and increase screening uptake (48).

789 The priority given to HIV over other diseases is reflected in people's knowledge. We found  
790 relatively good knowledge about HIV compared to syphilis and hepatitis B. However, the lack  
791 of knowledge on the transmission of HIV and misconception about the risks of transmission  
792 lead to high stigmatisation of HIV-positive people within families and in the community.  
793 Overall, we found a large taboo surrounding sexual health and STDs, as found by other  
794 studies conducted in Nepal (49,50). These taboos lead to discriminatory behaviour. Generally,  
795 people delay care seeking in Nepal but when it comes to STDs, individuals further delay  
796 screening and care due to shame and fear of judgement. Counselling for HIV has been shown  
797 to be an effective strategy to reduce stigma and increase community knowledge (51).

798 However, in Nepal, counselling seems to be case-by-case with women usually not informed  
799 on the purpose of the blood tests they are having. Our findings underscore the importance of  
800 awareness programs at the community-level which might help make up for the lack of  
801 resources for individual counselling. To reduce stigma, community awareness campaigns will  
802 need to be accompanied by the promotion of a culture of transparency by healthcare  
803 professionals towards patients regarding the objectives of screening and the importance of  
804 sharing screening results. The more health professionals associate themselves with  
805 stigmatisation by not mentioning diseases to patients, the slower the resolution of  
806 stigmatisation may be.

807 Financial barriers prevent access to, and acceptance of, screening. Financial barriers to  
808 antenatal screening were identified in other Asian studies (52,53). People move between  
809 facilities to save money even when this implies long waiting times in public hospitals.  
810 Switching between providers can break continuity of care and increase crowding in  
811 governmental hospitals. Individuals' choice of health facility can be driven by a wide  
812 disparity in prices and quality between public and private facilities (54,55) and is often  
813 influenced by neighbours or family members (56,57).

814 We found that the husband's lack of involvement or support for antenatal screening or more  
815 generally during pregnancy is often due to a lack of time, the result of pressure to bring  
816 money home, rather than an intention to withdraw support. Husbands' lack of engagement is  
817 reinforced by migration, especially in rural areas (19). In Nepal, women usually move into  
818 their husband's households after marriage (58,59). Her decision-making power in a household  
819 that is not her own is often weak (60,61). This trend is changing in recent years, mostly in  
820 urban contexts with people no longer living in joint families. However, social position within  
821 the household remains an important determinant of decision-making capacity in Nepal  
822 (62,63). The migration of husbands often complicates the communication between spouses

823 and increases the involvement of in-laws in women’s pregnancies. We found that women in  
824 joint households generally need the approval of their in-laws before making decisions about  
825 their health, which has also been found by others (64,65). This again suggests the importance  
826 of community-level interventions to raise awareness about the importance of triple screening  
827 in pregnancy as well as general understanding about ANC.

828 Our study has several limitations. Firstly, in Kathmandu, participants were recruited through  
829 the PMWH, which meant that all the women interviewed had already attended at least one  
830 ANC visit and we were not able to access women who had not received ANC. Secondly,  
831 given the sensitivity of the subject, people were sometimes reluctant to answer questions  
832 about STDs. When people said they did not know about HIV or how it was transmitted, it was  
833 almost impossible to determine whether this was a real lack of knowledge or shyness about  
834 discussing the subject. Although we planned to interview husbands, mothers-in-law, and  
835 pregnant women from the same households, this was only possible in a subset of households  
836 in Kapilvastu and in none of the cases in Kathmandu. This limited our capacity to triangulate  
837 and compare perceptions of different household members within households.

838 Despite limitations, our study offers unique insights on factors influencing integrated  
839 antenatal screening for HIV, syphilis, and hepatitis B in Nepal. Improving integrated antenatal  
840 screening will require a multi-sectoral approach that involves strengthening healthcare  
841 systems, addressing stigma and discrimination, and increasing investment in syphilis and  
842 hepatitis B prevention programs. It will require greater engagement with communities through  
843 awareness programs and enhancement of the role of health posts, especially in big cities, to  
844 regulate the flow of patients in large public hospitals. Decongestion of the public health  
845 system might also be facilitated by regulation of prices for services in the private sector.

## 846 **Conclusion**

847 Our study demonstrated that numerous interrelated factors affect integrated antenatal  
848 screening for HIV, syphilis, and hepatitis B in Nepal. Although supply side such as a lack of  
849 resources or a shortage of health workers for screening were important, we also found that  
850 husbands and in-laws play a key role in women's screening decisions. Findings highlight the  
851 need for investment in the sector, increased training for health workers and awareness  
852 campaigns for men and women at the community-level.

## 853 **Acknowledgments**

854 None.

## 855 **References**

- 856 1. UNAIDS. AIDSinfo. Geneva: Joint United Nations Programme on HIV/AIDS. [Internet].  
857 2018. Disponible sur: <http://aidsinfo.unaids.org/>
- 858 2. Newman L, Rowley J, Vander Hoorn S, Wijesooriya NS, Unemo M, Low N, et al. Global  
859 estimates of the prevalence and incidence of four curable sexually transmitted infections  
860 in 2012 based on systematic review and global reporting. PloS one.  
861 2015;10(12):e0143304.
- 862 3. WHO. Global hepatitis report. Geneva. Licence: CC BY-NC-SA. 2017;3.
- 863 4. UNAIDS. Country progress report - Nepal, Global AIDS Monitoring. 2020;
- 864 5. WHO. Workshop on development of costed action plans for viral hepatitis in the South-  
865 East Asia Region. World Health Organization. Regional Office for South-East Asia;  
866 2019.
- 867 6. WHO. Report on global sexually transmitted infection surveillance 2018. World Health  
868 Organization; 2018.

- 869 7. Dao H, Mofenson LM, Ekpini R, Gilks CF, Barnhart M, Bolu O, et al. International  
870 recommendations on antiretroviral drugs for treatment of HIV-infected women and  
871 prevention of mother-to-child HIV transmission in resource-limited settings: 2006 update.  
872 American journal of obstetrics and gynecology. 2007;197(3):S42–55.
- 873 8. Wendel Jr GD, Sheffield JS, Hollier LM, Hill JB, Ramsey PS, Sánchez PJ. Treatment of  
874 syphilis in pregnancy and prevention of congenital syphilis. Clinical Infectious Diseases.  
875 2002;35(Supplement\_2):S200–9.
- 876 9. van Zonneveld M, Van Nunen A, Niesters H, De Man R, Schalm S, Janssen H.  
877 Lamivudine treatment during pregnancy to prevent perinatal transmission of hepatitis B  
878 virus infection. Journal of viral hepatitis. 2003;10(4):294–7.
- 879 10. WHO. Regional framework for the triple elimination of mother-to-child transmission of  
880 HIV, hepatitis B and syphilis in Asia and the Pacific, 2018-2030. 2018;
- 881 11. Ministry of Health and Population. National HIV Testing and Treatment Guidelines 2017.  
882 2017.
- 883 12. Ministry of Health and Population. Nepal Safe Motherhood and Newborn Health Road  
884 Map 2030. 2019.
- 885 13. Pokharel S, Abbas H, Ghimire A. Response to antenatal HIV testing and prevention of  
886 parent to child transmission: an experience in a tertiary hospital in Chitwan, Nepal.  
887 Journal of College of Medical Sciences-Nepal. 2011;7(3):36–8.
- 888 14. Thapa R, Yang Y, Kang JH, Nho JH. Empowerment as a predictor of HIV testing among  
889 married women in Nepal. Journal of the Association of Nurses in AIDS Care.  
890 2019;30(5):563–74.

- 891 15. Acharya K, Thapa R, Bhattarai N, Bam K, Shrestha B. Availability and readiness to  
892 provide sexually transmitted infections and HIV testing and counselling services in Nepal:  
893 evidence from comprehensive health facility survey. *BMJ open*. 2020;10(12):e040918.
- 894 16. Ministry of Foreign Affairs. Nepal Profile – Ministry of Foreign Affairs Nepal MOFA  
895 [Internet]. 2023 [cité 30 mai 2023]. Disponible sur: [https://mofa.gov.np/nepal-profile-](https://mofa.gov.np/nepal-profile-updated/)  
896 [updated/](https://mofa.gov.np/nepal-profile-updated/)
- 897 17. Ministry of Health and Population. Health Management Information System (HMIS)  
898 Portal Website [Internet]. 2023 [cité 30 mai 2023]. Disponible sur: :  
899 <http://hmis.mohp.gov.np/portal/apps/healthstats/>
- 900 18. UNDP, Government of Nepal. Nepal Human Development Report. Kathmandu:  
901 Government of Nepal, National Planning Commission. 2014.
- 902 19. International Organization for Migration. Migration in Nepal: a Country Profile 2019.  
903 2019.
- 904 20. National Statistics Office. Preliminary Report of National Population Census 2021  
905 [Internet]. 2021. Disponible sur: <https://censusnepal.cbs.gov.np/Home/Details?tpid=1>
- 906 21. Ministry of Education, UNESCO, UNICEF. Global Initiative on Out-of-School-Children  
907 – Nepal Country Study. 2016.
- 908 22. Elmir R, Schmied V, Jackson D, Wilkes L. Interviewing people about potentially  
909 sensitive topics. *Nurse researcher*. 2011;19(1).
- 910 23. Dempsey L, Dowling M, Larkin P, Murphy K. Sensitive interviewing in qualitative  
911 research. *Research in nursing & health*. 2016;39(6):480–90.

- 912 24. Gram L, Skordis-Worrall J, Mannell J, Manandhar DS, Saville N, Morrison J. Revisiting  
913 the patriarchal bargain: The intergenerational power dynamics of household money  
914 management in rural Nepal. *World Development*. 2018;112:193–204.
- 915 25. Barter C, Renold E. The use of vignettes in qualitative research. *Social research update*.  
916 1999;25(9):1–6.
- 917 26. Törrönen J. Using vignettes in qualitative interviews as clues, microcosms or provokers.  
918 *Qualitative Research Journal*. 2018;18(3):276–86.
- 919 27. Groot T de, Jacquet W, Backer FD, Peters R, Meurs P. Using visual vignettes to explore  
920 sensitive topics: a research note on exploring attitudes towards people with albinism in  
921 Tanzania. *International Journal of Social Research Methodology*. 2020;23(6):749–55.
- 922 28. Green J, Thorogood N. *Qualitative methods for health research*. sage; 2018.
- 923 29. McLeroy KR, Bibeau D, Steckler A, Glanz K. An ecological perspective on health  
924 promotion programs. *Health education quarterly*. 1988;15(4):351–77.
- 925 30. WHO. *Strengthening health systems to improve health outcomes: WHO’s framework for*  
926 *action*. Geneva: WHO. 2007;
- 927 31. Ritchie J, Spencer L, Bryman A, Burgess RG. *Analysing qualitative data*. Routledge,  
928 London; 1994.
- 929 32. Tong A, Sainsbury P, Craig J. Consolidated criteria for reporting qualitative research  
930 (COREQ): a 32-item checklist for interviews and focus groups. *International journal for*  
931 *quality in health care*. 2007;19(6):349–57.



- 932 33. O'Brien BC, Harris IB, Beckman TJ, Reed DA, Cook DA. Standards for reporting  
933 qualitative research: a synthesis of recommendations. *Academic medicine*.  
934 2014;89(9):1245–51.
- 935 34. UNICEF. Nepal MICS Statistical Snapshot. 2019.
- 936 35. Acharya KK. Federalism practice in Nepal: Does it move in the expected course.  
937 *Dhaulagiri Journal of Sociology and Anthropology*. 2021;15(1):20–34.
- 938 36. Thapa R, Bam K, Tiwari P, Sinha TK, Dahal S. Implementing federalism in the health  
939 system of Nepal: opportunities and challenges. *International journal of health policy and*  
940 *management*. 2019;8(4):195.
- 941 37. Analytica O. Government instability will be endemic in Nepal. *Emerald Expert Briefings*.  
942 2023;(oxan-db).
- 943 38. Tamang P, Simkhada P, Bissell P, van Teijlingen E, Khatri R, Stephenson J. Health  
944 facility preparedness of maternal and neonatal health services: a survey in Jumla, Nepal.  
945 *BMC health services research*. 2021;21(1):1–10.
- 946 39. Lama TP, Munos MK, Katz J, Khatri SK, LeClerq SC, Mullany LC. Assessment of  
947 facility and health worker readiness to provide quality antenatal, intrapartum and  
948 postpartum care in rural Southern Nepal. *BMC health services research*.  
949 2020;20(1):1–12.
- 950 40. Bohren MA, Vazquez Corona M, Odiase OJ, Wilson AN, Sudhinaraset M, Diamond-  
951 Smith N, et al. Strategies to reduce stigma and discrimination in sexual and reproductive  
952 healthcare settings: A mixed-methods systematic review. *PLOS Global Public Health*.  
953 2022;2(6):e0000582.

- 954 41. WHO. Progress report on the regional action plan for viral hepatitis in the WHO South-  
955 East Asia Region (2016–2021). 2020;
- 956 42. Acharya KK, Scott J. A study of the capabilities and limitations of local governments in  
957 providing community services in Nepal. *Public Administration and Policy*.  
958 2022;25(1):64–77.
- 959 43. Schaffner J, Sharma U, Glewwe P. Federalism in Nepal: Early Implications for Service  
960 Delivery in Education. Kathmandu, doi. 2020;10.
- 961 44. Ministry of Health and Population, New ERA, ICF. Nepal Health Facility Survey 2021  
962 [Internet]. Kathmandu, Nepal, Rockville, Maryland, USA: Ministry of Health and  
963 Population, New ERA and ICF; 2022. Disponible sur:  
964 <https://www.dhsprogram.com/pubs/pdf/SPA35/SPA35.pdf>
- 965 45. Ministry of Health and Population. National Guidelines, Prevention of Mother-to-Child  
966 Transmission of HIV in Nepal. 2011;
- 967 46. The Global Fund. The Global Fund Data: Nepal Overview. [Internet]. 2023. Disponible  
968 sur: <https://data.theglobalfund.org/location/NPL/overview>
- 969 47. Ministry of Health and Population. DHIS2 Tracker, NHIS Nepal. 2010.
- 970 48. Cohn J, Owiredo MN, Taylor MM, Easterbrook P, Lesi O, Francoise B, et al. Eliminating  
971 mother-to-child transmission of human immunodeficiency virus, syphilis and hepatitis B  
972 in sub-Saharan Africa. *Bulletin of the World Health Organisation*. 2021;99(4):287.
- 973 49. Chaudhary S, Kakchupati S. Social stigma, discrimination, and their determinants among  
974 people living with HIV and AIDS in Sudurpashchim Province, Nepal. *HIV & AIDS  
975 Review International Journal of HIV-Related Problems*. 2022;21(3):230–8.

- 976 50. Bhattarai N, Bam K, Acharya K, Thapa R, Shrestha B. Factors associated with HIV  
977 testing and counselling services among women and men in Nepal: a cross-sectional study  
978 using data from a nationally representative survey. *BMJ open*. 2021;11(12):e049415.
- 979 51. Nyblade L, Stangl A, Weiss E, Ashburn K. Combating HIV stigma in health care settings:  
980 what works? *Journal of the international AIDS Society*. 2009;12:1□7.
- 981 52. Baker C, Limato R, Tumbelaka P, Rewari BB, Nasir S, Ahmed R, et al. Antenatal testing  
982 for anaemia, HIV and syphilis in Indonesia - A health systems analysis of low coverage.  
983 *BMC Pregnancy and Childbirth* [Internet]. 2020;20(1). Disponible sur:  
984 [https://www.scopus.com/inward/record.uri?eid=2-s2.0-  
985 85085713812&doi=10.1186%2fs12884-020-02993-  
986 x&partnerID=40&md5=8bd18346cbc80a82cead0ba9d4cc3dba](https://www.scopus.com/inward/record.uri?eid=2-s2.0-85085713812&doi=10.1186%2fs12884-020-02993-x&partnerID=40&md5=8bd18346cbc80a82cead0ba9d4cc3dba)
- 987 53. Crozier K, Chotiga P, Pfeil M. Factors influencing HIV screening decisions for pregnant  
988 migrant women in South East Asia. *Midwifery*. 2013;29(7):e57□63.
- 989 54. Karkee R, Lee AH, Pokharel PK. Women's perception of quality of maternity services: a  
990 longitudinal survey in Nepal. *BMC pregnancy and childbirth*. 2014;14(1):1□7.
- 991 55. Mehata S, Paudel YR, Dariang M, Aryal KK, Paudel S, Mehta R, et al. Factors  
992 determining satisfaction among facility-based maternity clients in Nepal. *BMC pregnancy  
993 and childbirth*. 2017;17:1□10.
- 994 56. Awasthi MS, Awasthi KR, Thapa HS, Saud B, Pradhan S, Khattry RA, et al. Utilization of  
995 antenatal care services in Dalit communities in Gorkha, Nepal: a cross-sectional study.  
996 *Journal of pregnancy*. 2018;2018.

- 997 57. Thapa P, Bangura AH, Nirola I, Citrin D, Belbase B, Bogati B, et al. The power of peers:  
998 an effectiveness evaluation of a cluster-controlled trial of group antenatal care in rural  
999 Nepal. *Reproductive health*. 2019;16:1–14.
- 1000 58. Pearlman J, Pearce LD, Ghimire DJ, Bhandari P, Hargrove T. Postmarital living  
1001 arrangements in historically patrilocal settings: integrating household fission and  
1002 migration perspectives. *Demography*. 2017;54(4):1425–49.
- 1003 59. Diamond-Smith N, Plaza N, Puri M, Dahal M, Weiser SD, Harper CC. Perceived  
1004 conflicting desires to delay the first birth: A household-level exploration in Nepal.  
1005 *International perspectives on sexual and reproductive health*. 2020;46:125.
- 1006 60. Khalil U, Mookerjee S. Patrilocal residence and women’s social status: evidence from  
1007 South Asia. *Economic Development and Cultural Change*. 2019;67(2):401–38.
- 1008 61. Pradhan R, Meizen-Dick R, Theis S. Property rights, intersectionality, and women’s  
1009 empowerment in Nepal. *Journal of Rural Studies*. 2019;70:26–35.
- 1010 62. Furuta M, Salway S. Women’s position within the household as a determinant of maternal  
1011 health care use in Nepal. *International family planning perspectives*. 2006;17–27.
- 1012 63. Diamond-Smith N, Raj A, Prata N, Weiser SD. Associations of women’s position in the  
1013 household and food insecurity with family planning use in Nepal. *PLoS One*.  
1014 2017;12(4):e0176127.
- 1015 64. Morrison J, Giri R, Arjyal A, Kharel C, Harris-Fry H, James P, et al. Addressing anaemia  
1016 in pregnancy in rural plains Nepal: A qualitative, formative study. *Maternal & child  
1017 nutrition*. 2021;17:e13170.

1018 65. Shahabuddin A, Delvaux T, Nöstlinger C, Sarker M, Bardají A, Sharkey A, et al.  
1019 Maternal health care-seeking behaviour of married adolescent girls: A prospective  
1020 qualitative study in Banke District, Nepal. PloS one. 2019;14(6):e0217968.

1021

## 1022 **Supporting information**

1023 **S1 File. Vignette 1 - A pregnant friend heard about ANC visits**

1024

### National-level

#### National guidelines

- Unclear role of provincial and local governments.
  - Implementation of national guidelines left to the discretion of local government.
  - Health system largely dependent on external donors.
  - Prices for ANC visits and blood tests vary between health facilities.
- Syphilis, HIV and HBV screening is part of the ANC protocol.
  - According to the ANC protocol, ANC-related examinations should be provided free of charge.

#### Health budget and health financing

- ANC visits free of charge in health posts.

### Community-level

#### Taboo around sexual health

- Taboo around sexual health and STDs.
- Discriminatory attitudes and behaviours.

#### Discriminatory attitudes and behaviours

- Awareness-raising programmes.

### Institutional-level

#### Service delivery

- Long waiting times.
- Availability and quality of blood tests and counselling depend on health facilities.
- Language barriers.

- Referral of patients from lower to higher level facilities.
- Counselling on STIs.

#### Health workforce

- Shortage and lack of training of health workers.
- Health workers' inappropriate behaviour.

- Willingness of health workers to respect confidentiality.
- Trust in health workers by the population.

#### Health information

- No systematic recording of data relating to syphilis and HBV.

- Systematic recording of HIV-related data.

#### Medical products

- Lack of resources (space, screening kits, laboratory services).

- Availability of HIV testing kits.

### Interpersonal-level

#### Husband's willingness to support

- Lack of support from the husband.
- Husbands not allowed in the room for ANC visits.

- Husband's support and willingness to get involved in the pregnancy.
- Open discussion between the spouses.
- Husband also tested for STDs during pregnancy.

#### In-laws' involvement

- Discussion only with people of the same sex about pregnancy, sexual health.
- Pregnant women need permission from in-laws before making decisions.

- Support from in-laws during check-ups.

#### Neighbours' involvement

- Neighbours spread rumours and stigmatise behaviour.

- Neighbours as an important source of information.

### Individual-level

#### Health negligence

- Neglect of health.
- Concealment of health problems.

- Compliance with the recommendations of health staff.

#### Knowledge about blood tests and STDs

- Lack of knowledge and awareness of syphilis and HBV.
- Mistaken beliefs about HIV.

- Awareness of the importance of ANC visits and blood tests.
- Communication campaign on the radio or at school.

#### Acceptance of blood tests

- Refusal to take a blood sample if explicitly to test for STDs.
- Financial barriers.
- Low perception of risks.

- Good acceptance of blood tests.

#### Deciding which health facility to visit

- Confidence in local health structures.

Screening for sexually transmitted diseases

Barriers

Facilitators

**National**  
(policies, laws, leadership,  
governance)

**Community**  
(norms, values)

**Institutional**  
(service delivery, health  
workforce, health information,  
medical products, health  
financing)

**Interpersonal**  
(family, friends,  
neighbours)

**Individual**  
(knowledge,  
attitudes, skills,  
beliefs)
